# Supplementary material for: Synthesis of nano-cubic ZnSn(OH)3 based on stannate reaction with liquid laser ablation-induced ZnO below room temperature
Source: Royal Society of Chemistry journal article supplement (doi:10.1039/c3ce40363g), 2013-01-01
Supplement: c3ce40363g.pdf [file c3ce40363g.pdf]

## Support Information

### Nano-Cubic ZnSn(OH)<sub>3</sub> Based on Stannate Reaction with the Liquid Laser

#### Ablation-induced ZnO below Room Temperature

Xiaoxia Xu, Guotao Duan, \* Yue Li, Hongwen Zhang, Guangqiang Liu and Weiping Cai \*

*Key Lab of Materials Physics, Anhui Key Lab of Nanomaterials and Nanotechnology,*

*Institute of Solid State Physics, Chinese Academy of Sciences, Hefei 230031, P.R. China*

Figure S1 Xiaoxia Xu, et al

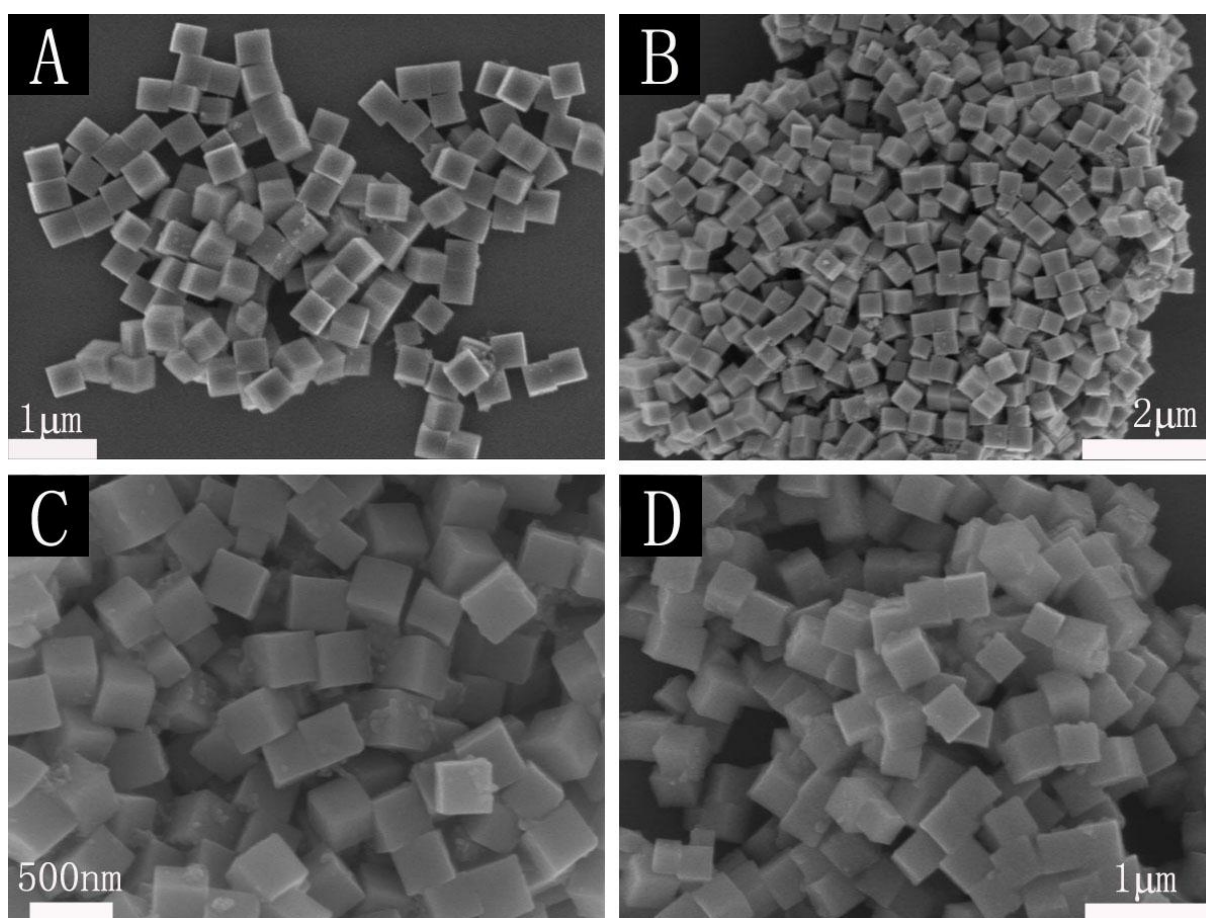

**Figure S1** The FESEM images of the sample after annealing at different temperatures. (a): as-prepared ZHS nanocubes. (b)-(d): after annealing at 300 °C, 600 °C and 800 °C for 4 h, respectively.

\* To whom all correspondence should be addressed  
E-mail: [duangt@issp.ac.cn](mailto:duangt@issp.ac.cn), [wpc@issp.ac.cn](mailto:wpc@issp.ac.cn)

Figure S2 Xiaoxia Xu, et al

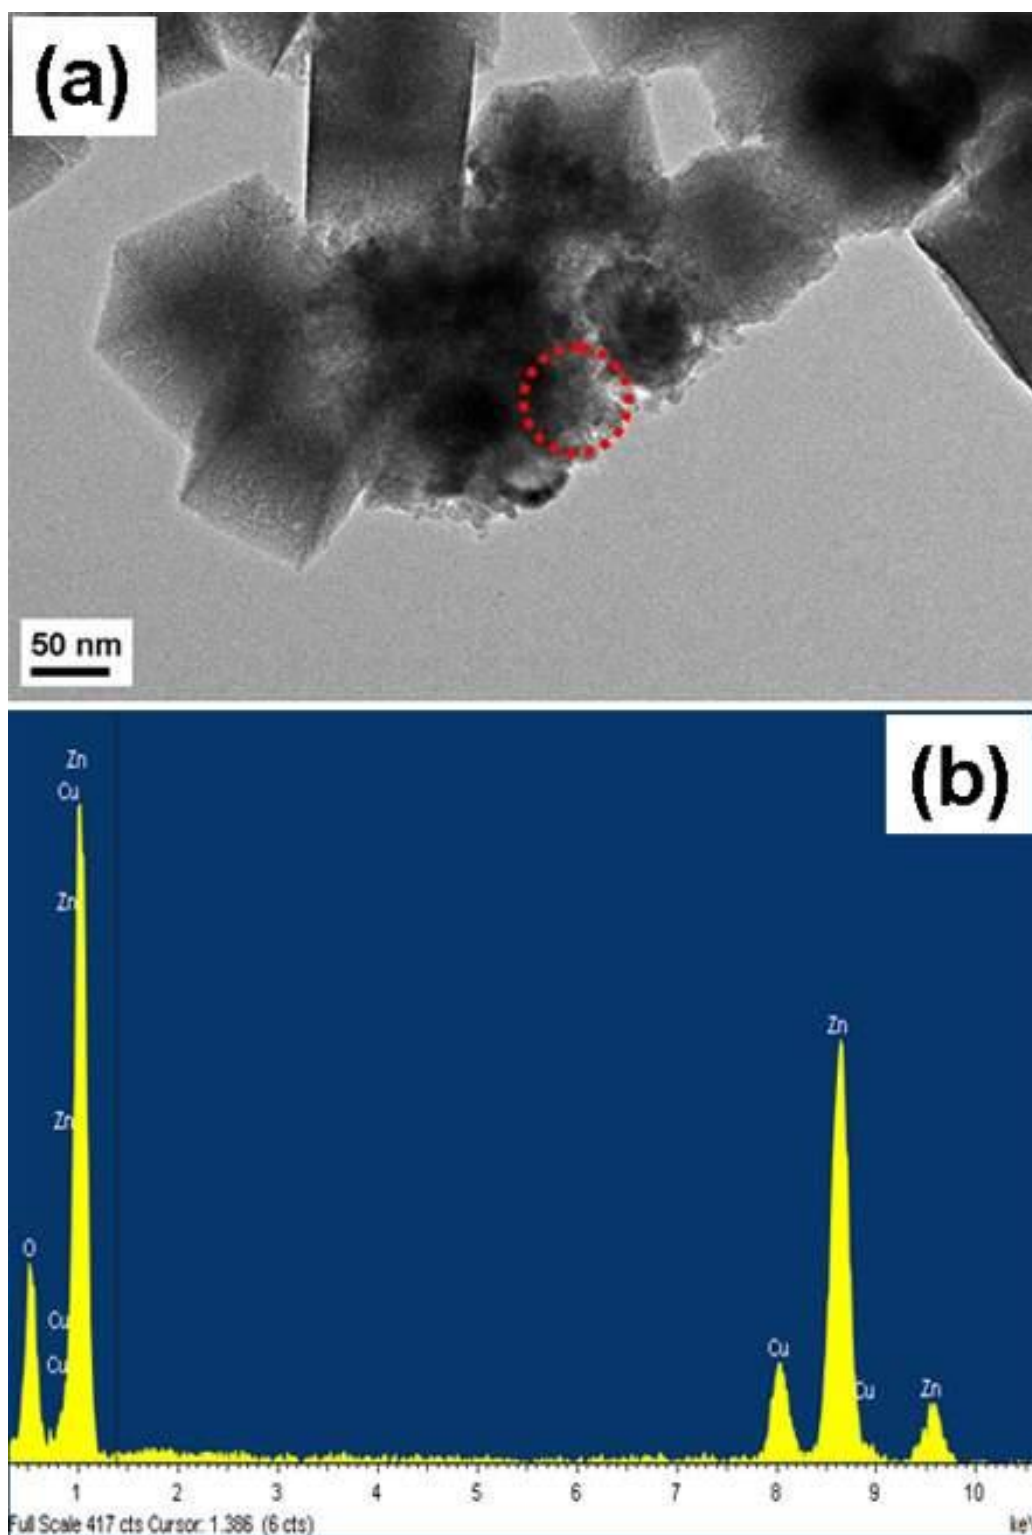

**Figure S2** (a): TEM image for the as-prepared sample after incomplete reaction (for less than 1 h) at 5 °C. (b): The EDX results corresponding to the area marked in (a).

Figure S3 Xiaoxia Xu, et al

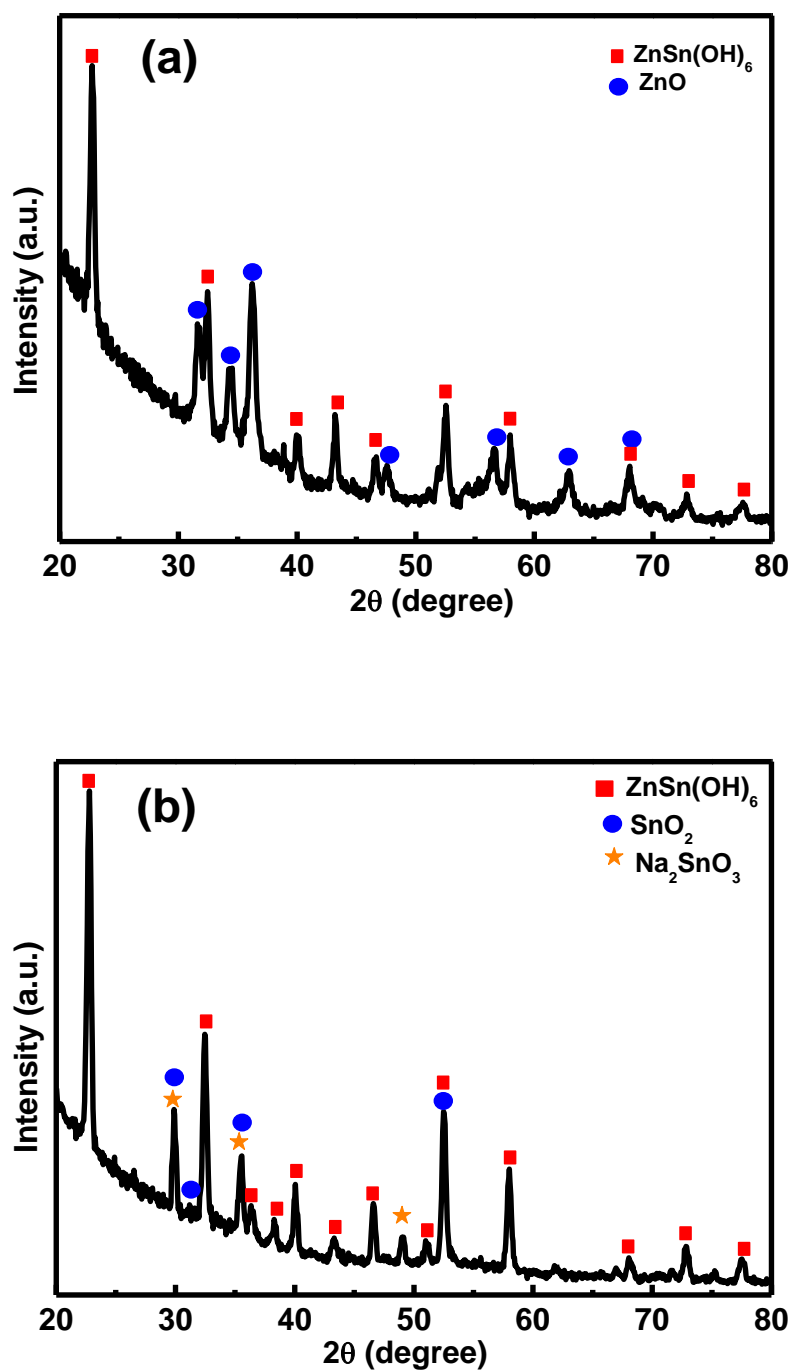

**Figure S3** XRD patterns of the products after reaction at 5 °C for 1h corresponding to the different molar ratios of ZnO to  $\text{Na}_2\text{SnO}_3$ . (a): 5:3, (b): 1:10. The products consist of ZHS and ZnO for (a), and ZHS,  $\text{SnO}_2$  and  $\text{Na}_2\text{SnO}_3$  for (b).

**Figure S4 Xiaoxia Xu, et al**

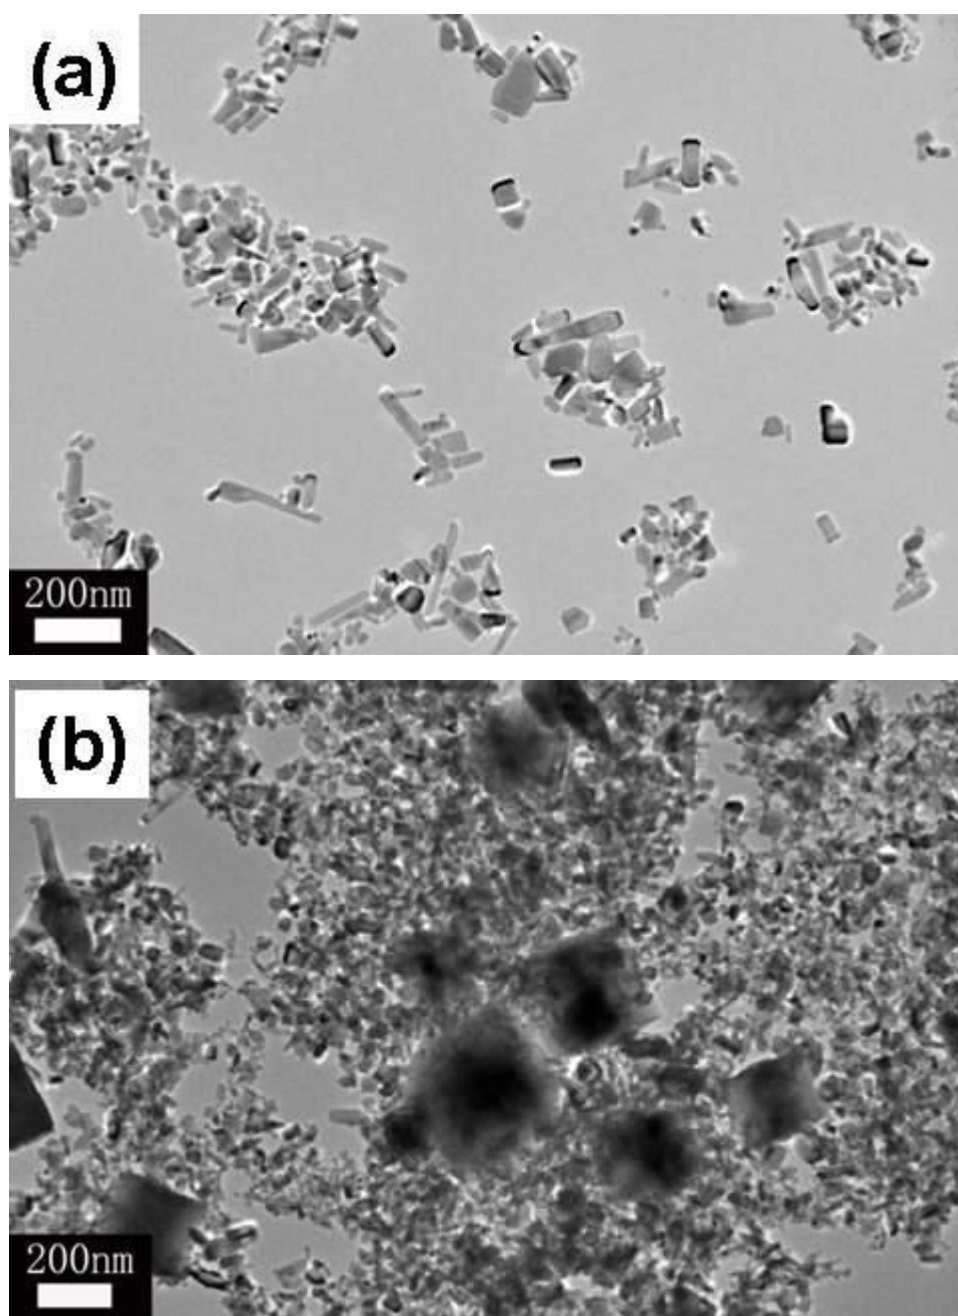

**Figure S4** TEM images of the ZnO nanoparticles, bought from Alfa Aesar, before (a) and after (b) reaction with  $\text{Na}_2\text{SnO}_3$  in solution at  $5\text{ }^\circ\text{C}$  for 1 h.
